# Supplementary material for: Diagnose und Entwicklung motorischer Basiskompetenzen
Source: Atypon-hosted journal article supplement (doi:10.1026/0049-8637/a000180), 2017-10-01
Supplement: 0049-8637_a000180_esm1.pdf [file 0049-8637_a000180_esm1.pdf]

**Elektronisches Supplement.** Deskriptive Werte der MOBAK-1-Testitems (0-2) und der MOBAK-Faktorsummenwerte (0-8)

| Testitems                            | Gesamt<br>(n = 838) |                  | Jungen<br>(n = 451) |                  | Mädchen<br>(n = 387) |                  | 70–84 Monate<br>(n = 596) |                  | 85–98 Monate<br>(n = 242) |                  | Normalgewicht<br>(n = 624) |                  | Übergewicht<br>(n = 168) |                  |
|--------------------------------------|---------------------|------------------|---------------------|------------------|----------------------|------------------|---------------------------|------------------|---------------------------|------------------|----------------------------|------------------|--------------------------|------------------|
|                                      | M                   | 95% CI           | M                   | 95% CI           | M                    | 95% CI           | M                         | 95% CI           | M                         | 95% CI           | M                          | 95% CI           | M                        | 95% CI           |
| <b>Sich-Bewegen (t<sub>1</sub>)</b>  | <b>4.5</b>          | <b>[4.4–4.6]</b> | <b>4.4</b>          | <b>[4.2–4.6]</b> | <b>4.6</b>           | <b>[4.4–4.8]</b> | <b>4.5</b>                | <b>[4.4–4.7]</b> | <b>4.4</b>                | <b>[4.2–4.7]</b> | <b>4.6</b>                 | <b>[4.4–4.7]</b> | <b>3.8</b>               | <b>[3.5–4.1]</b> |
| <i>Balancieren (t<sub>1</sub>)</i>   | 1.7                 | [1.7–1.7]        | 1.7                 | [1.7–1.8]        | 1.7                  | [1.6–1.7]        | 1.7                       | [1.6–1.7]        | 1.7                       | [1.6–1.8]        | 1.7                        | [1.7–1.8]        | 1.5                      | [1.4–1.6]        |
| <i>Rollen (t<sub>1</sub>)</i>        | 1.2                 | [1.1–1.2]        | 1.1                 | [1.1–1.2]        | 1.2                  | [1.1–1.3]        | 1.2                       | [1.1–1.2]        | 1.1                       | [1.0–1.3]        | 1.2                        | [1.1–1.3]        | 0.9                      | [0.8–1.0]        |
| <i>Springen (t<sub>1</sub>)</i>      | 0.6                 | [0.6–0.7]        | 0.5                 | [0.4–0.6]        | 0.7                  | [0.6–0.8]        | 0.6                       | [0.6–0.7]        | 0.6                       | [0.5–0.7]        | 0.6                        | [0.6–0.7]        | 0.5                      | [0.4–0.6]        |
| <i>Laufen (t<sub>1</sub>)</i>        | 1.0                 | [1.0–1.1]        | 1.1                 | [1.0–1.1]        | 1.0                  | [0.9–1.1]        | 1.1                       | [1.0–1.1]        | 1.0                       | [0.9–1.2]        | 1.0                        | [1.0–1.1]        | 0.9                      | [0.8–1.1]        |
| <b>Etwas-Bewegen (t<sub>1</sub>)</b> | <b>4.0</b>          | <b>[3.9–4.2]</b> | <b>4.7</b>          | <b>[4.6–4.9]</b> | <b>3.2</b>           | <b>[3.0–3.4]</b> | <b>3.8</b>                | <b>[3.6–4.0]</b> | <b>4.6</b>                | <b>[4.4–4.9]</b> | <b>4.0</b>                 | <b>[3.9–4.2]</b> | <b>4.0</b>               | <b>[3.7–4.3]</b> |
| <i>Werfen (t<sub>1</sub>)</i>        | 0.7                 | [0.7–0.8]        | 0.9                 | [0.8–0.9]        | 0.6                  | [0.5–0.6]        | 0.7                       | [0.6–0.7]        | 0.9                       | [0.8–1.0]        | 0.7                        | [0.6–0.7]        | 0.9                      | [0.7–1.0]        |
| <i>Fangen (t<sub>1</sub>)</i>        | 1.4                 | [1.4–1.5]        | 1.5                 | [1.5–1.6]        | 1.3                  | [1.2–1.4]        | 1.4                       | [1.3–1.4]        | 1.5                       | [1.5–1.6]        | 1.4                        | [1.4–1.5]        | 1.4                      | [1.3–1.5]        |
| <i>Prellen (t<sub>1</sub>)</i>       | 0.9                 | [0.8–0.9]        | 1.1                 | [1.1–1.2]        | 0.6                  | [0.5–0.7]        | 0.8                       | [0.7–0.8]        | 1.1                       | [1.0–1.2]        | 0.9                        | [0.8–1.0]        | 0.8                      | [0.7–0.9]        |
| <i>Dribbeln (t<sub>1</sub>)</i>      | 1.0                 | [1.0–1.1]        | 1.2                 | [1.2–1.3]        | 0.8                  | [0.7–0.9]        | 1.0                       | [0.9–1.1]        | 1.1                       | [1.0–1.2]        | 1.1                        | [1.0–1.1]        | 1.0                      | [0.8–1.1]        |
| <b>Sich-Bewegen (t<sub>2</sub>)</b>  | <b>5.7</b>          | <b>[5.6–5.8]</b> | <b>5.5</b>          | <b>[5.3–5.7]</b> | <b>5.9</b>           | <b>[5.7–6.1]</b> | <b>5.7</b>                | <b>[5.6–5.8]</b> | <b>5.6</b>                | <b>[5.4–5.9]</b> | <b>5.9</b>                 | <b>[5.8–6.0]</b> | <b>4.8</b>               | <b>[4.5–5.1]</b> |
| <i>Balancieren (t<sub>2</sub>)</i>   | 1.8                 | [1.8–1.9]        | 1.8                 | [1.8–1.9]        | 1.8                  | [1.8–1.9]        | 1.8                       | [1.8–1.9]        | 1.8                       | [1.7–1.8]        | 1.9                        | [1.8–1.9]        | 1.7                      | [1.6–1.8]        |
| <i>Rollen (t<sub>2</sub>)</i>        | 1.5                 | [1.4–1.5]        | 1.4                 | [1.4–1.5]        | 1.5                  | [1.4–1.6]        | 1.5                       | [1.4–1.5]        | 1.5                       | [1.4–1.6]        | 1.6                        | [1.5–1.6]        | 1.2                      | [1.1–1.3]        |
| <i>Springen (t<sub>2</sub>)</i>      | 1.0                 | [0.9–1.0]        | 0.8                 | [0.8–0.9]        | 1.1                  | [1.0–1.2]        | 1.0                       | [0.9–1.0]        | 1.0                       | [0.9–1.1]        | 1.0                        | [1.0–1.1]        | 0.8                      | [0.7–0.9]        |
| <i>Laufen (t<sub>2</sub>)</i>        | 1.4                 | [1.4–1.5]        | 1.4                 | [1.3–1.4]        | 1.5                  | [1.4–1.6]        | 1.4                       | [1.4–1.5]        | 1.4                       | [1.3–1.5]        | 1.5                        | [1.4–1.5]        | 1.2                      | [1.1–1.3]        |
| <b>Etwas-Bewegen (t<sub>2</sub>)</b> | <b>5.4</b>          | <b>[5.2–5.5]</b> | <b>6.1</b>          | <b>[5.9–6.2]</b> | <b>4.6</b>           | <b>[4.4–4.7]</b> | <b>5.2</b>                | <b>[5.1–5.4]</b> | <b>5.7</b>                | <b>[5.5–5.9]</b> | <b>5.4</b>                 | <b>[5.2–5.6]</b> | <b>5.2</b>               | <b>[5.0–5.5]</b> |
| <i>Werfen (t<sub>2</sub>)</i>        | 1.1                 | [1.0–1.1]        | 1.3                 | [1.2–1.3]        | 0.8                  | [0.8–0.9]        | 1.0                       | [1.0–1.1]        | 1.2                       | [1.1–1.2]        | 1.1                        | [1.0–1.1]        | 1.1                      | [1.0–1.2]        |
| <i>Fangen (t<sub>2</sub>)</i>        | 1.7                 | [1.7–1.7]        | 1.8                 | [1.7–1.8]        | 1.6                  | [1.6–1.7]        | 1.7                       | [1.6–1.7]        | 1.8                       | [1.7–1.8]        | 1.7                        | [1.6–1.7]        | 1.7                      | [1.6–1.8]        |
| <i>Prellen (t<sub>2</sub>)</i>       | 1.3                 | [1.2–1.3]        | 1.5                 | [1.4–1.6]        | 1.0                  | [0.9–1.1]        | 1.2                       | [1.2–1.3]        | 1.4                       | [1.3–1.5]        | 1.3                        | [1.2–1.4]        | 1.1                      | [1.0–1.3]        |
| <i>Dribbeln (t<sub>2</sub>)</i>      | 1.3                 | [1.3–1.4]        | 1.6                 | [1.5–1.6]        | 1.1                  | [1.0–1.2]        | 1.3                       | [1.3–1.4]        | 1.4                       | [1.3–1.5]        | 1.4                        | [1.3–1.4]        | 1.3                      | [1.1–1.4]        |
